# Supplementary material for: Fluorescence Quenching and Electron Transfer Dynamics of a Thiophene-Substituted 1,3,4-Oxadiazole Derivative with Nitroaromatic Compounds
Source: Research Square preprint supplement (doi:10.21203/rs.3.rs-6239689/v1), 2025-03-31
Supplement: Supplementary file 1 [file 1be92729441d04a7d9e217c5.docx]

**Table-S1** The lifetime values of NACs with TSO:

| concentration of amines (Q) in mM | Nitrobenzene | 2-nitrotoulene | 4-nitrobenzene | Picric acid |
| --- | --- | --- | --- | --- |
| 1 | 0.78 | 0.81 | 0.82 | 0.80 |
| 2 | 0.76 | 0.78 | 0.82 | 0.75 |
| 3 | 0.72 | 0.77 | 0.81 | 0.67 |
| 4 | 0.70 | 0.75 | 0.79 | 0.65 |
| 5 | 0.70 | 0.74 | 0.77 | 0.63 |
| 6 | 0.67 | 0.73 | 0.76 | 0.61 |
| 7 | 0.65 | 0.72 | 0.75 | 0.58 |
| 8 | 0.62 | 0.70 | 0.73 | 0.54 |
| 9 | 0.60 | 0.70 | 0.72 | 0.53 |
| 10 | 0.58 | 0.68 | 0.71 | 0.50 |
